# Supplementary material for: Putative Bifunctional Chorismate Mutase/Prephenate Dehydratase Contributes to the Virulence of Acidovorax citrulli
Source: Front Plant Sci. 2020 Sep 25;11:569552. doi: 10.3389/fpls.2020.569552 (PMC7546022; doi:10.3389/fpls.2020.569552)
Supplement: Supplementary file 5 [file Table_4.xlsx]

## Sheet: Sheet1
Supplementary data 4. Classification of highly expressed (> 2 fold) protein list in AcΔcmpAc by clusters of orthologous groups
COG function	Accession	gene function	fold change	p-value	included in other group
C (Energy production and conversion)	ATG93913	cytochrome c oxidase subunit II	*
	ATG94865	cytochrome-c oxidase, cbb3-type subunit I	*
	ATG95074	NADH-quinone oxidoreductase subunit L	*
	ATG95078	NADH-quinone oxidoreductase subunit H	*
	ATG96306	indolepyruvate ferredoxin oxidoreductase	*
	ATG96854	thiol oxidoreductase	*
D (Cell cycle control, cell division, chromosome partitioning)	ATG92671	chromosome segregation protein SMC	*
E (Amino Acid metabolism and transport)	ATG96653	alanine racemase	*
G (Carbohydrate metabolism and transport)	ATG93526	C4-dicarboxylate ABC transporter substrate-binding protein	*
	ATG93845	MFS transporter	*
	ATG95271	D-hexose-6-phosphate mutarotase	*
H (Coenzyme metabolism)	ATG93488	4a-hydroxytetrahydrobiopterin dehydratase	*
I (Lipid metabolism)	ATG92642	3-hydroxyacyl-CoA dehydrogenase	*
	ATG92643	acetyl-CoA C-acyltransferase	*
J (Translation)	ATG93509	50S ribosomal protein L33	*
K (Transcription)	ATG93642	DNA-directed RNA polymerase subunit omega	*
L (Replication and repair)	ATG94206	amine oxidase	*
	ATG94886	TIGR00645 family protein	*
	ATG95672	uracil-DNA glycosylase	*
	ATG96041	site-specific DNA-methyltransferase	*
M (Cell wall/membrane/envelop biogenesis)	ATG95298	ABC transporter	2.07583	0.0121126
	ATG96209	LPS biosynthesis protein	2.53674	0.0256128
	ATG96563	porin	2.715	0.00192918
	ATG94386	outer membrane protein assembly factor BamD	*
	ATG94573	RIP metalloprotease RseP	*
	ATG94916	efflux RND transporter periplasmic adaptor subunit	*
	ATG95027	glycine zipper 2TM domain-containing protein	*
	ATG95207	porin	*
	ATG96145	TolC family protein	*
	ATG96188	KpsF/GutQ family sugar-phosphate isomerase	*
	ATG96577	secretion protein HlyD	*
N (Cell motility)	ATG96536	chemotaxis protein CheD	2.03447	0.00365466	T
	ATG96977	type VI secretion system protein TssL	*
O (Post-translational modification, protein turnover, chaperone functions)	ATG93010	NrdH-redoxin	*
	ATG95026	peptidylprolyl isomerase	*
	ATG96585	protease HtpX	*
P (Inorganic ion transport and metabolism)	ATG97071	TonB-dependent siderophore receptor	4.22957	0.0294555
	ATG93279	nitrate ABC transporter substrate-binding protein	*
	ATG93869	rhodanese-like domain-containing protein	*
	ATG96986	TonB-dependent siderophore receptor	*
Q (Secondary Structure)	ATG93957	MoxR family ATPase	*
S (Function Unknown)	ATG96150	methyl-accepting chemotaxis protein	3.16661	0.00330698
	ATG94948	DUF4115 domain-containing protein	3.2383	0.024697
	ATG95276	penicillin-binding protein activator LpoB	3.30312	0.0247327
	ATG96089	methyl-accepting chemotaxis protein	3.36175	0.00424778
	ATG94945	hypothetical protein CQB05_13690	3.39907	0.0302404
	ATG96440	methyl-accepting chemotaxis protein	3.53476	0.0222253
	ATG96471	methyl-accepting chemotaxis protein	3.7413	0.0159515
	ATG94996	DUF4198 domain-containing protein	4.11804	0.0177029
	ATG92865	hypothetical protein CQB05_01415	*
	ATG92941	methyl-accepting chemotaxis protein	*
	ATG93311	chemotaxis protein	*
	ATG93438	chemotaxis protein	*
	ATG93943	tripartite tricarboxylate transporter substrate binding protein	*
	ATG94173	hypothetical protein CQB05_09120	*
	ATG94244	hypothetical protein CQB05_09515	*
	ATG94372	hypothetical protein CQB05_10265	*
	ATG94388	hypothetical protein CQB05_10360	*
	ATG94545	SPOR domain-containing protein	*
	ATG94912	hypothetical protein CQB05_13440	*
	ATG94965	methyl-accepting chemotaxis protein	*
	ATG95157	hypothetical protein CQB05_14940	*
	ATG95846	LemA family protein	*
	ATG96165	hypothetical protein CQB05_20785	*
	ATG96470	PepSY domain-containing protein	*
	ATG96728	hypothetical protein CQB05_24175	*
	ATG96859	methyl-accepting chemotaxis protein	*
	ATG97084	hypothetical protein CQB05_20725	*
T (Signal Transduction)	ATG97068	hypothetical protein CQB05_19715	2.75722	0.00438587
	ATG93194	methyl-accepting chemotaxis protein	*
	ATG93478	sigma-54-dependent Fis family transcriptional regulator	*
	ATG93626	hybrid sensor histidine kinase/response regulator	*
	ATG94156	hybrid sensor histidine kinase/response regulator	*
	ATG95427	two-component system response regulator GlrR	*
U (Intracellular trafficing and secretion)	ATG96727	type II secretion system protein GspD	2.00422	0.0128287
	ATG96181	membrane protein insertase YidC	2.17686	0.000385623
	ATG94444	MotA/TolQ/ExbB proton channel family protein	2.37731	0.0166637
	ATG95315	pilus assembly protein PilO	*
	ATG96309	protein translocase subunit SecF	*
V (Defense mechanisms)	ATG95001	MexE family multidrug efflux RND transporter periplasmic adaptor subunit	*
* indicate the protein is unique to AcΔcmpAc.
